# Supplementary material
Source: PubMed Central journal article supplement (PMC3246234)
Supplement: ismej201178x1.pdf [file ismej201178x1.pdf]

# Supplementary Information

## ***De Novo* Metagenomic Assembly Reveals Abundant Novel Major Lineage of Archaea in Hypersaline Microbial Communities**

Priya Narasingarao, Sheila Podell, Juan A. Ugalde, Céline Brochier-Armanet, Joanne B. Emerson, Jochen J. Brocks, Karla B. Heidelberg, Jillian F. Banfield, Eric E. Allen

### **Contents**

|                                  |    |
|----------------------------------|----|
| Supplementary Methods .....      | 2  |
| Supplementary Tables S1-S8 ..... | 5  |
| Supplementary Figures S1-S2..... | 16 |
| References.....                  | 19 |

## Supplementary Methods

### *Metagenome assembly methods*

Details of genomic DNA sequence libraries are provided in **Supplementary Table S1**. Sanger end sequencing yielded average read lengths of 800 nucleotides. One 0.1  $\mu\text{m}$  filter library was also pyrosequenced using 454 Titanium chemistry, with an average read length of 400 nucleotides. Assembly software parameters were systematically varied in preliminary assemblies to empirically identify settings producing maximum scaffold length, minimum gap length, and sharpest peak resolution in a length-weighted histogram of scaffold percent GC. Final assembly parameters were:

```
utgErrorRate=0.10
ovlErrorRate=0.10
cnsErrorRate=0.10
cgwErrorRate=0.12
utgBubblePopping=0
utgGenomeSize=500000
merSize=15
doFragmentCorrection=0
doExtendClearRanges=1
doResolveSurrogates=1
Unitigger parameter -j = -20.
```

Composite assemblies including all available libraries were used to classify scaffolds into one of four categories: Nanohaloarchaea, non-Nanohaloarchaea, ambiguous, or unclassified. Scaffold classifications were based on manual assessment of multiple independent parameters. Matches to known microbial 16S rRNA sequences were identified by BLASTN search against the GreenGenes reference database (DeSantis *et al.*, 2006), requiring a minimum alignment length of 200 nucleotides and e-value of  $1\text{e-}7$  or better. For each scaffold, number and alignment quality of predicted protein matches to GenBank sequences associated with previously sequenced halophilic archaeal genomes were assessed based on a BLASTX search against the GenBank nr database with an e-value cutoff of  $1\text{e-}5$  or better. For scaffolds longer than 3,000 nucleotides, distribution of reads derived from the 0.1  $\mu\text{m}$  and 0.8  $\mu\text{m}$  filter libraries and percent G+C nucleotide composition were also considered in determining scaffold origin.

A second, iterative round of assembly was performed combining all reads previously associated with scaffolds identified as possible Nanohaloarchaea, ambiguous or unclassified. Unassembled singletons reads were also included in the second round, but reads associated with scaffolds identified as non-Nanohaloarchaea were excluded. Scaffolds from the second round of assembly were classified according to the same procedures as the first round.

### ***Phylogenetic analysis methods***

Sixty-six individual ribosomal protein datasets from Euryarchaeotal genomes (**Supplementary Table S8**), including J07AB43 and J07ABA56, were aligned using MAFFT version 6.833 (Philippe, 1993). All alignments were visually inspected and manually corrected when necessary. Regions where the alignment was doubtful were removed prior to further phylogenetic analyses. Datasets for nine ribosomal proteins were discarded because of insufficient taxonomic sampling (L13e, L14e, L20a, L30e, L34e, L35ae, S25e, S26e, S30e), since these proteins were absent in more than 10 euryarchaeal genomes. The remaining 57 ribosomal proteins were combined to construct a single alignment containing 5858 amino acid positions. This alignment was subsequently recoded using Dayhoff 4 categories (ASTGP, DNEQ, RHK and MVILFWY, with cysteines being considered as missing characters) (Hrdy *et al.*, 2004; Susko and Roger, 2007). A subset of 43 of the original 68 archaeal genomes were selected to represent the diversity of Euryarchaeota, eliminating multiple closely related representatives of the same order (e.g. *Pyrococcus*, *Thermococcus*, *Methanosarcina*, and *Methanococcus maripaludis*).

Maximum likelihood (ML) phylogenetic analyses were performed using both TreeFinder v.10.08 (Jobb *et al.*, 2004) and PhyML version 3.0 (Guindon and Gascuel, 2003). The evolutionary model was chosen in agreement with the ‘propose model’ tool implemented in TreeFinder (AICc criterion). For the euryarchaeal 16S rRNA and the ribosomal protein recoded alignment analyses we used the General Time Reversible model, with empirical nucleic acids estimated frequencies, a gamma correction (4 discrete categories and an estimated alpha-parameter) to take into account evolutionary rate variation across sites. For the euryarchaeal 16S rRNA analysis we have also considered that a proportion of the sites were invariant (this proportion was estimated by ML). For the alignment of the non-recoded ribosomal protein concatenation analysis, the Le and Gascuel model with empirical amino acid estimated frequencies, a gamma correction (4 discrete categories and an estimated alpha-parameter), and an estimated frequency of invariant sites was employed. Additional ML phylogenetic analyses of these three datasets were performed using

PhyML with the same parameters. Finally, nanohaloarchaeal diversity (Figure 6) was inferred by ML phylogenetic analysis via TreeFinder using the J1 model and gamma correction. The robustness of each resulting ML phylogenetic tree was estimated using non parametric bootstrap approaches implemented in TreeFinder and PhyML (100 replicates of the original dataset).

**Supplementary Table S1.** Summary of Lake Tyrrell metagenomic sequencing libraries used in this study. Average read length is shown  $\pm$  standard deviation.

| <b>Library name</b> | <b>Retention Filter</b> | <b>Collection Date</b> | <b>Library type</b> | <b>Sequencing platform</b> | <b>Number of reads</b> | <b>Avg. read length</b>         |
|---------------------|-------------------------|------------------------|---------------------|----------------------------|------------------------|---------------------------------|
| ABM                 | 0.8 $\mu$ m             | 1/23/2007              | 8-10 kb plasmid     | Sanger                     | 81,197                 | 776 $\pm$ 157                   |
| ABL                 | 0.8 $\mu$ m             | 1/23/2007              | 40 kb fosmid        | Sanger                     | 43,490                 | 599 $\pm$ 230                   |
| CBM                 | 0.8 $\mu$ m             | 1/25/2007              | 8-10 kb plasmid     | Sanger                     | 81,032                 | 781 $\pm$ 155                   |
| CBL                 | 0.8 $\mu$ m             | 1/25/2007              | 40 kb fosmid        | Sanger                     | 33,029                 | 678 $\pm$ 191                   |
| AAM                 | 0.1 $\mu$ m             | 1/23/2007              | 8-10 kb plasmid     | Sanger                     | 95,988                 | 699 $\pm$ 198                   |
| CAM                 | 0.1 $\mu$ m             | 1/25/2007              | 8-10 kb plasmid     | Sanger                     | 92,242                 | 747 $\pm$ 179                   |
| CAT                 | 0.1 $\mu$ m             | 1/25/2007              | 454-Titanium        | Pyrosequence               | 205,925                | 401 $\pm$ 120                   |
| <b>Total</b>        |                         |                        |                     |                            | <b>632,903</b>         | <b>622 <math>\pm</math> 229</b> |

**Supplementary Table S2.** Assembly properties of J07AB43 and J07AB56 group scaffolds. Total percentages were calculated as length-weighted averages.

| <b>Group</b>    | <b>Scaffold ID</b> | <b>Scaffold length</b> | <b>Gap length</b> | <b>Num. gaps</b> | <b>Read depth</b> | <b>% GC</b> | <b>% 0.1 <math>\mu</math>m reads</b> |
|-----------------|--------------------|------------------------|-------------------|------------------|-------------------|-------------|--------------------------------------|
| <b>J07NFR43</b> | <b>Total</b>       | <b>1,227,157</b>       | <b>26,201</b>     | <b>210</b>       | <b>8.3</b>        | <b>43%</b>  | <b>97%</b>                           |
|                 | 7180000030744      | 798,418                | 8,083             | 144              | 8.8               | 43%         | 97%                                  |
|                 | 7180000030739      | 112,863                | 310               | 9                | 9.7               | 43%         | 97%                                  |
|                 | 7180000030726      | 111,825                | 3,412             | 19               | 5.9               | 43%         | 99%                                  |
|                 | 7180000030734      | 65,032                 | 370               | 12               | 7.9               | 43%         | 96%                                  |
|                 | 7180000030724      | 54,503                 | 2,312             | 8                | 5.4               | 43%         | 98%                                  |
|                 | 7180000030742      | 52,428                 | 8,276             | 10               | 8.1               | 43%         | 98%                                  |
|                 | 7180000030737      | 32,088                 | 3,438             | 8                | 6.0               | 44%         | 97%                                  |
| <b>J07NFR56</b> | <b>Total</b>       | <b>1,215,802</b>       | <b>121,708</b>    | <b>259</b>       | <b>5.1</b>        | <b>56%</b>  | <b>92%</b>                           |
|                 | 7180000039101      | 959,093                | 100,058           | 208              | 5.1               | 56%         | 92%                                  |
|                 | 7180000039072      | 196,424                | 8,804             | 40               | 5.3               | 55%         | 93%                                  |
|                 | 7180000039097      | 60,285                 | 12,846            | 11               | 4.5               | 55%         | 97%                                  |

**Supplementary Table S3.** Estimation of draft genome completeness by detection of 53 highly conserved archaeal proteins.

| Func_id | Func_name                                                 | J07AB56 | J07AB43 |
|---------|-----------------------------------------------------------|---------|---------|
| COG0013 | Alanyl-tRNA synthetase                                    | +       | +       |
| COG0018 | Arginyl-tRNA synthetase                                   | +       | +       |
| COG0455 | ATPases involved in chromosome partitioning               | +       | +       |
| COG0459 | Chaperonin GroEL (HSP60 family)                           | +       | +       |
| COG0085 | DNA-directed RNA polymerase, beta subunit/140 kD subunit  | +       | +       |
| COG0086 | DNA-directed RNA polymerase, beta' subunit/160 kD subunit | +       | +       |
| COG0008 | Glutamyl- and glutamyl-tRNA synthetases                   | +       | +       |
| COG0124 | Histidyl-tRNA synthetase                                  | +       | +       |
| COG0060 | Isoleucyl-tRNA synthetase                                 | +       | +       |
| COG0495 | Leucyl-tRNA synthetase                                    | +       | +       |
| COG0024 | Methionine aminopeptidase                                 | +       | +       |
| COG0143 | Methionyl-tRNA synthetase                                 | +       | +       |
| COG0071 | Molecular chaperone (small heat shock protein)            | +       | +       |
| COG0016 | Phenylalanyl-tRNA synthetase alpha subunit                | +       | +       |
| COG0177 | Predicted EndoIII-related endonuclease                    | +       | +       |
| COG0012 | Predicted GTPase, probable translation factor             | +       | +       |
| COG0201 | Preprotein translocase subunit SecY                       | +       | +       |
| COG0130 | Pseudouridine synthase                                    | +       | +       |
| COG0468 | RecA/RadA recombinase                                     | +       | +       |
| COG0164 | Ribonuclease HII                                          | +       | +       |
| COG0081 | Ribosomal protein L1                                      | +       | +       |
| COG0080 | Ribosomal protein L11                                     | +       | +       |
| COG0102 | Ribosomal protein L13                                     | +       | +       |
| COG0093 | Ribosomal protein L14                                     | +       | -       |
| COG0200 | Ribosomal protein L15                                     | +       | +       |
| COG0197 | Ribosomal protein L16/L10E                                | +       | +       |
| COG0256 | Ribosomal protein L18                                     | +       | +       |

| Func_id | Func_name                                      | J07AB56 | J07AB43 |
|---------|------------------------------------------------|---------|---------|
| COG0090 | Ribosomal protein L2                           | +       | -       |
| COG0091 | Ribosomal protein L22                          | +       | -       |
| COG0087 | Ribosomal protein L3                           | +       | -       |
| COG0088 | Ribosomal protein L4                           | +       | -       |
| COG0094 | Ribosomal protein L5                           | +       | +       |
| COG0097 | Ribosomal protein L6P/L9E                      | +       | +       |
| COG0051 | Ribosomal protein S10                          | +       | +       |
| COG0100 | Ribosomal protein S11                          | +       | +       |
| COG0048 | Ribosomal protein S12                          | +       | +       |
| COG0099 | Ribosomal protein S13                          | +       | +       |
| COG0186 | Ribosomal protein S17                          | +       | -       |
| COG0185 | Ribosomal protein S19                          | +       | -       |
| COG0052 | Ribosomal protein S2                           | +       | +       |
| COG0092 | Ribosomal protein S3                           | +       | -       |
| COG0522 | Ribosomal protein S4 and related proteins      | +       | +       |
| COG0098 | Ribosomal protein S5                           | +       | +       |
| COG0049 | Ribosomal protein S7                           | +       | +       |
| COG0096 | Ribosomal protein S8                           | +       | +       |
| COG0103 | Ribosomal protein S9                           | +       | +       |
| COG0441 | Threonyl-tRNA synthetase                       | +       | +       |
| COG0250 | Transcription antiterminator                   | +       | +       |
| COG0480 | Translation elongation factors (GTPases)       | +       | +       |
| COG0361 | Translation initiation factor 1 (IF-1)         | +       | -       |
| COG0532 | Translation initiation factor 2 (IF-2; GTPase) | +       | +       |
| COG0180 | Tryptophanyl-tRNA synthetase                   | +       | +       |
| COG0525 | Valyl-tRNA synthetase                          | +       | +       |

|         |  |      |     |
|---------|--|------|-----|
| Total   |  | 53   | 44  |
| percent |  | 100% | 83% |



**Supplementary Table S4.** Cell counts from fluorescence in situ hybridization images of Lake Tyrrell Australia and South Bay Salt Works, Chula Vista, California.

**(a) Lake Tyrrell, Australia (LT)**

|                 | <b>Detection</b>     | <b>Number<br/>(Cells/mL)</b> | <b>Pct.</b> |
|-----------------|----------------------|------------------------------|-------------|
| Total           | DAPI                 | $1.6 \pm 0.3 \times 10^7$    | 100         |
| Archaea         | Arc915 FISH probe    | $1.4 \pm 0.2 \times 10^7$    | 90          |
| Nanohaloarchaea | Narc_1214 FISH probe | $2 \pm 0.5 \times 10^6$      | 14          |
| Bacteria        | Eubmix FISH probe    | $1.9 \pm 0.5 \times 10^6$    | 10          |

**(b) South Bay Salt Works, Chula Vista, California (CV)**

|                 | <b>Detection</b>     | <b>November, 2009</b>        |             | <b>June, 2010</b>            |             |
|-----------------|----------------------|------------------------------|-------------|------------------------------|-------------|
|                 |                      | <b>Number<br/>(Cells/mL)</b> | <b>Pct.</b> | <b>Number<br/>(Cells/mL)</b> | <b>Pct.</b> |
| Total           | DAPI                 | $3.2 \pm 0.3 \times 10^7$    | 100         | $3.4 \pm 0.3 \times 10^7$    | 100         |
| Archaea         | Arc915 FISH probe    | $2.6 \pm 0.3 \times 10^7$    | 83          | $2.8 \pm 0.2 \times 10^7$    | 77          |
| Nanohaloarchaea | NArc_1214 FISH probe | $2.5 \pm 0.4 \times 10^6$    | 8           | $3.8 \pm 0.7 \times 10^6$    | 11          |
| Bacteria        | Eubmix FISH probe    | $5.5 \pm 0.3 \times 10^6$    | 17          | $7.9 \pm 0.4 \times 10^6$    | 23          |

**Supplementary Table S5.** DNA-distance matrix comparison of 16S rRNA genes.

|                                           | <b>J07AB43</b> | <b>J0756AB</b> | <i>Halorubrum lacusprofundi</i> | <i>Haloquadratum walsbyi</i> | <i>Halogeometricum borinquense</i> | <i>Halomicrobium mukohataei</i> | <i>Natrialba magadii</i> | <i>Haloterrigena turkmenica</i> | <i>Halobacterium salinarum</i> | <i>Natronomonas pharaonis</i> | <i>Haloarcula marismortui</i> | <i>Halorhabdus utahensis</i> |
|-------------------------------------------|----------------|----------------|---------------------------------|------------------------------|------------------------------------|---------------------------------|--------------------------|---------------------------------|--------------------------------|-------------------------------|-------------------------------|------------------------------|
| <b>J07AB43 (<i>Nanosalina</i> sp.)</b>    |                |                |                                 |                              |                                    |                                 |                          |                                 |                                |                               |                               |                              |
| <b>J0756AB (<i>Nanosalinarum</i> sp.)</b> | 16%            |                |                                 |                              |                                    |                                 |                          |                                 |                                |                               |                               |                              |
| <i>Halorubrum lacusprofundi</i>           | 34%            | 35%            |                                 |                              |                                    |                                 |                          |                                 |                                |                               |                               |                              |
| <i>Haloquadratum walsbyi</i>              | 37%            | 35%            | 15%                             |                              |                                    |                                 |                          |                                 |                                |                               |                               |                              |
| <i>Halogeometricum borinquense</i>        | 35%            | 37%            | 14%                             | 9%                           |                                    |                                 |                          |                                 |                                |                               |                               |                              |
| <i>Halomicrobium mukohataei</i>           | 34%            | 34%            | 14%                             | 16%                          | 16%                                |                                 |                          |                                 |                                |                               |                               |                              |
| <i>Natrialba magadii</i>                  | 35%            | 36%            | 14%                             | 14%                          | 11%                                | 15%                             |                          |                                 |                                |                               |                               |                              |
| <i>Haloterrigena turkmenica</i>           | 35%            | 35%            | 15%                             | 13%                          | 12%                                | 16%                             | 4%                       |                                 |                                |                               |                               |                              |
| <i>Halobacterium salinarum</i>            | 33%            | 34%            | 13%                             | 14%                          | 13%                                | 14%                             | 11%                      | 12%                             |                                |                               |                               |                              |
| <i>Natronomonas pharaonis</i>             | 34%            | 32%            | 13%                             | 14%                          | 12%                                | 13%                             | 12%                      | 12%                             | 10%                            |                               |                               |                              |
| <i>Haloarcula marismortui</i>             | 34%            | 36%            | 16%                             | 15%                          | 14%                                | 11%                             | 11%                      | 12%                             | 11%                            | 10%                           |                               |                              |
| <i>Halorhabdus utahensis</i>              | 32%            | 34%            | 15%                             | 16%                          | 13%                                | 14%                             | 10%                      | 10%                             | 9%                             | 9%                            | 8%                            |                              |

**Supplementary Table S6.** Complete amino acid compositions of microbial genomes shown in Figure 5, ordered by taxonomic group. Key numbers are based on genome percent G+C ranked in ascending order.

| key | Species                                      | pet GC | Glu  | Asp | Gln | Asn | Lys  | Arg | His | Ser | Thr | Tyr | Gly | Ala  | Val | Leu | Ile  | Pro | Phe | Trp | Met | Cys | Taxonomic Group    |
|-----|----------------------------------------------|--------|------|-----|-----|-----|------|-----|-----|-----|-----|-----|-----|------|-----|-----|------|-----|-----|-----|-----|-----|--------------------|
| 19  | <i>J07AB43 (Nanosalina sp.)</i>              | 43     | 10.1 | 7.3 | 3.7 | 4.6 | 5.8  | 4.7 | 1.7 | 7.6 | 5.2 | 3.3 | 6.8 | 5.9  | 6.9 | 8.1 | 6.3  | 3.4 | 3.8 | 0.9 | 2.3 | 0.7 | Nanohaloarchaea    |
| 39  | <i>J07AB56 (Nanosalinarum sp.)</i>           | 56     | 10.0 | 7.3 | 3.6 | 3.4 | 3.8  | 6.5 | 1.8 | 7.6 | 5.3 | 2.7 | 7.8 | 7.3  | 8.2 | 8.9 | 4.4  | 3.8 | 3.5 | 0.8 | 2.0 | 0.7 | Nanohaloarchaea    |
| 43  | <i>Haloarcula marismortui</i>                | 61     | 8.1  | 8.3 | 3.1 | 2.6 | 2.0  | 6.1 | 2.0 | 6.0 | 6.9 | 2.7 | 8.3 | 10.4 | 8.6 | 8.8 | 4.4  | 4.6 | 3.3 | 1.1 | 1.9 | 0.8 | Halobacteriales    |
| 50  | <i>Halobacterium salinarum R1</i>            | 65     | 7.1  | 8.9 | 2.8 | 2.2 | 1.8  | 6.5 | 2.2 | 5.4 | 6.8 | 2.6 | 8.2 | 12.4 | 9.3 | 8.6 | 3.8  | 4.6 | 3.1 | 1.1 | 1.7 | 0.8 | Halobacteriales    |
| 41  | <i>Halogeometricum borinquense</i>           | 61     | 8.3  | 8.2 | 2.7 | 2.7 | 2.3  | 6.3 | 2.0 | 6.2 | 6.7 | 2.7 | 8.1 | 10.2 | 8.9 | 8.7 | 4.3  | 4.5 | 3.5 | 1.1 | 1.8 | 0.7 | Halobacteriales    |
| 51  | <i>Halomicrobium mukohataei</i>              | 66     | 8.3  | 8.6 | 2.7 | 2.2 | 1.7  | 6.7 | 2.0 | 5.6 | 6.7 | 2.7 | 8.5 | 11.1 | 9.2 | 8.9 | 3.9  | 4.6 | 3.2 | 1.2 | 1.7 | 0.7 | Halobacteriales    |
| 28  | <i>Haloquadratum walsbyi</i>                 | 48     | 7.4  | 7.8 | 3.4 | 3.4 | 2.3  | 5.8 | 2.1 | 6.8 | 7.9 | 2.8 | 7.5 | 9.4  | 7.8 | 8.2 | 6.2  | 4.4 | 3.2 | 1.0 | 1.8 | 0.8 | Halobacteriales    |
| 46  | <i>Halorhabdus utahensis</i>                 | 63     | 8.6  | 8.5 | 2.7 | 2.3 | 1.8  | 6.4 | 2.0 | 5.6 | 6.7 | 2.6 | 8.5 | 10.6 | 8.9 | 8.9 | 4.5  | 4.6 | 3.3 | 1.2 | 1.7 | 0.6 | Halobacteriales    |
| 48  | <i>Halorubrum lacusprofundi</i>              | 64     | 8.5  | 8.8 | 2.4 | 2.5 | 2.0  | 6.7 | 2.0 | 5.5 | 6.3 | 2.7 | 8.5 | 11.0 | 8.8 | 8.7 | 4.2  | 4.6 | 3.3 | 1.1 | 1.7 | 0.7 | Halobacteriales    |
| 49  | <i>Haloterrigena turkmenica</i>              | 65     | 9.2  | 8.6 | 2.4 | 2.4 | 1.7  | 6.7 | 2.0 | 5.7 | 6.5 | 2.7 | 8.3 | 10.5 | 8.6 | 8.8 | 4.4  | 4.7 | 3.2 | 1.2 | 1.7 | 0.8 | Halobacteriales    |
| 42  | <i>Natrialba magadii</i>                     | 61     | 9.2  | 8.9 | 2.8 | 2.5 | 1.8  | 6.0 | 2.1 | 6.0 | 6.9 | 2.7 | 8.1 | 10.4 | 8.3 | 8.7 | 4.5  | 4.6 | 3.2 | 1.1 | 1.7 | 0.7 | Halobacteriales    |
| 45  | <i>Natronomonas pharaonis</i>                | 63     | 8.8  | 8.7 | 2.6 | 2.2 | 1.9  | 6.4 | 2.0 | 5.3 | 6.4 | 2.6 | 8.4 | 11.4 | 8.9 | 8.8 | 4.2  | 4.6 | 3.3 | 1.1 | 1.7 | 0.8 | Halobacteriales    |
| 4   | <i>Methanobrevibacter smithii</i>            | 31     | 7.0  | 6.5 | 2.3 | 6.8 | 8.0  | 3.0 | 1.6 | 6.5 | 5.3 | 4.0 | 6.6 | 6.0  | 6.8 | 8.6 | 9.4  | 3.2 | 4.3 | 0.7 | 2.3 | 1.3 | Methanobacteriales |
| 1   | <i>Methanosphaera stadtmanae</i>             | 29     | 6.8  | 6.1 | 2.6 | 7.5 | 8.2  | 3.0 | 1.7 | 6.3 | 6.7 | 4.3 | 5.9 | 5.2  | 6.3 | 8.4 | 10.3 | 3.2 | 3.6 | 0.6 | 2.3 | 1.2 | Methanobacteriales |
| 29  | <i>Methanobacterium thermoautotrophicum</i>  | 49     | 8.1  | 5.9 | 1.9 | 3.3 | 4.6  | 6.8 | 1.9 | 6.1 | 5.0 | 3.2 | 8.0 | 7.3  | 7.7 | 9.4 | 7.7  | 4.3 | 3.6 | 0.8 | 3.1 | 1.2 | Methanobacteriales |
| 7   | <i>Methanothermobacter feravidus</i>         | 32     | 7.4  | 5.1 | 1.6 | 4.9 | 10.6 | 4.1 | 1.7 | 5.3 | 4.6 | 3.7 | 6.7 | 5.9  | 7.1 | 8.9 | 10.0 | 4.1 | 3.9 | 0.7 | 2.4 | 1.3 | Methanobacteriales |
| 3   | <i>Methanococcus jannaschii</i>              | 31     | 8.6  | 5.5 | 1.5 | 5.3 | 10.4 | 3.8 | 1.4 | 4.5 | 4.0 | 4.4 | 6.3 | 5.5  | 6.8 | 9.5 | 10.5 | 3.4 | 4.3 | 0.7 | 2.3 | 1.3 | Methanococcales    |
| 2   | <i>Methanococcus aeolicus Nankai-3</i>       | 31     | 7.5  | 5.6 | 1.8 | 7.1 | 9.6  | 3.0 | 1.6 | 5.4 | 4.8 | 4.1 | 6.7 | 5.4  | 6.1 | 8.7 | 10.8 | 3.5 | 3.7 | 0.6 | 2.6 | 1.4 | Methanococcales    |
| 5   | <i>Methanococcus vannielii SB</i>            | 32     | 7.9  | 5.2 | 1.8 | 6.0 | 9.4  | 3.2 | 1.5 | 6.4 | 4.9 | 3.9 | 6.6 | 5.3  | 6.7 | 9.3 | 9.9  | 3.4 | 4.3 | 0.6 | 2.5 | 1.3 | Methanococcales    |
| 6   | <i>Methanococcus voltae A3</i>               | 32     | 7.7  | 5.8 | 2.1 | 7.4 | 9.3  | 2.9 | 1.4 | 6.1 | 5.1 | 4.3 | 6.2 | 5.4  | 6.3 | 9.0 | 9.5  | 3.1 | 3.7 | 0.6 | 2.6 | 1.4 | Methanococcales    |
| 8   | <i>Methanococcus maripaludis C5</i>          | 33     | 8.3  | 5.6 | 1.9 | 5.6 | 8.9  | 3.2 | 1.5 | 6.2 | 5.0 | 3.9 | 6.6 | 5.6  | 6.8 | 9.2 | 9.4  | 3.3 | 4.3 | 0.6 | 2.6 | 1.3 | Methanococcales    |
| 34  | <i>Methanocella paludicola</i>               | 54     | 6.2  | 5.8 | 2.4 | 3.6 | 6.1  | 5.2 | 1.7 | 6.1 | 5.2 | 3.6 | 8.0 | 8.6  | 7.7 | 9.2 | 7.1  | 4.5 | 3.7 | 1.0 | 3.2 | 1.3 | Methanocellales    |
| 38  | <i>Candidatus Methanosphaerula palustris</i> | 56     | 6.1  | 5.6 | 3.4 | 3.4 | 3.9  | 5.6 | 2.0 | 6.1 | 6.8 | 3.0 | 8.2 | 8.5  | 7.8 | 9.4 | 7.0  | 4.8 | 3.7 | 1.0 | 2.5 | 1.3 | Methanomicrobiales |
| 36  | <i>Candidatus Methanoregula boonei</i>       | 55     | 6.1  | 5.3 | 2.9 | 3.3 | 4.7  | 5.5 | 2.0 | 6.0 | 6.2 | 3.0 | 8.0 | 9.5  | 7.5 | 9.2 | 7.2  | 4.9 | 3.9 | 1.0 | 2.4 | 1.4 | Methanomicrobiales |

| key | Species                              | pct GC | Glu  | Asp | Gln | Asn | Lys | Arg | His | Ser | Thr | Tyr | Gly | Ala  | Val  | Leu  | Ile  | Pro | Phe | Trp | Met | Cys | Taxonomic Group    |
|-----|--------------------------------------|--------|------|-----|-----|-----|-----|-----|-----|-----|-----|-----|-----|------|------|------|------|-----|-----|-----|-----|-----|--------------------|
| 31  | <i>Methanocorpusculum labreanum</i>  | 50     | 6.7  | 5.5 | 2.5 | 3.6 | 5.5 | 4.7 | 1.8 | 6.0 | 6.0 | 3.4 | 7.8 | 8.5  | 7.5  | 9.2  | 7.6  | 4.4 | 3.9 | 0.9 | 2.9 | 1.5 | Methanomicrobiales |
| 44  | <i>Methanoculleus marisnigri</i>     | 62     | 7.2  | 5.7 | 2.3 | 2.7 | 3.4 | 7.0 | 2.0 | 5.1 | 5.5 | 3.0 | 8.5 | 10.2 | 8.3  | 9.5  | 6.1  | 5.0 | 3.6 | 1.0 | 2.4 | 1.3 | Methanomicrobiales |
| 30  | <i>Methanoplanus petrolearius</i>    | 50     | 7.5  | 6.0 | 2.2 | 4.1 | 5.7 | 4.5 | 1.6 | 6.9 | 5.3 | 3.6 | 7.9 | 7.2  | 7.0  | 8.7  | 8.4  | 4.1 | 4.3 | 1.0 | 2.7 | 1.4 | Methanomicrobiales |
| 25  | <i>Methanospirillum hungatei</i>     | 45     | 6.8  | 5.8 | 3.2 | 3.6 | 5.0 | 5.2 | 2.2 | 6.7 | 5.8 | 3.4 | 7.3 | 7.0  | 6.5  | 9.2  | 8.5  | 4.7 | 4.0 | 1.1 | 2.6 | 1.4 | Methanomicrobiales |
| 35  | <i>Methanosaeta thermophila</i>      | 54     | 7.3  | 5.8 | 2.1 | 2.9 | 4.0 | 7.5 | 1.8 | 6.7 | 4.6 | 3.1 | 7.9 | 8.3  | 7.8  | 9.5  | 7.3  | 4.5 | 3.3 | 1.0 | 3.1 | 1.3 | Methanosarcinales  |
| 16  | <i>Methanococcoides burtonii</i>     | 41     | 7.3  | 6.3 | 2.5 | 4.6 | 6.5 | 4.2 | 1.9 | 6.7 | 5.4 | 3.4 | 7.1 | 6.8  | 7.3  | 8.9  | 8.4  | 3.6 | 4.0 | 0.9 | 3.0 | 1.2 | Methanosarcinales  |
| 21  | <i>Methanohalophilus mahii</i>       | 43     | 7.7  | 6.2 | 2.8 | 4.5 | 6.1 | 4.5 | 1.9 | 6.4 | 5.3 | 3.4 | 7.4 | 7.1  | 7.2  | 8.8  | 8.0  | 3.9 | 3.8 | 0.8 | 2.9 | 1.3 | Methanosarcinales  |
| 11  | <i>Methanosalsum zhilinae</i>        | 38     | 7.4  | 6.3 | 2.7 | 4.6 | 6.2 | 4.7 | 2.0 | 6.9 | 5.1 | 3.5 | 7.0 | 6.5  | 6.9  | 8.6  | 9.0  | 3.8 | 3.9 | 0.9 | 2.9 | 1.2 | Methanosarcinales  |
| 15  | <i>Methanosarcina barkeri fusaro</i> | 41     | 7.6  | 5.2 | 2.6 | 4.8 | 7.0 | 4.2 | 1.7 | 7.0 | 5.5 | 3.7 | 7.1 | 6.8  | 6.8  | 9.4  | 7.8  | 3.9 | 4.3 | 1.0 | 2.4 | 1.2 | Methanosarcinales  |
| 20  | <i>Methanosarcina mazei</i>          | 43     | 8.2  | 5.3 | 2.5 | 4.4 | 6.8 | 4.7 | 1.7 | 6.8 | 5.1 | 3.5 | 7.2 | 7.1  | 6.9  | 9.4  | 7.7  | 4.0 | 4.3 | 0.9 | 2.5 | 1.2 | Methanosarcinales  |
| 22  | <i>Methanosarcina acetivorans</i>    | 44     | 8.0  | 5.3 | 2.5 | 4.5 | 6.6 | 4.5 | 1.7 | 6.9 | 5.4 | 3.7 | 7.2 | 6.9  | 6.8  | 9.4  | 7.4  | 4.0 | 4.4 | 1.1 | 2.5 | 1.3 | Methanosarcinales  |
| 40  | <i>Methanopyrus kandleri</i>         | 60     | 10.0 | 5.8 | 1.4 | 1.9 | 4.0 | 8.3 | 1.9 | 4.6 | 4.6 | 2.8 | 8.1 | 8.3  | 10.4 | 10.1 | 4.8  | 5.5 | 2.9 | 1.2 | 1.9 | 1.3 | Methanopyrales     |
| 18  | <i>Archaeoglobus profundus</i> 1     | 43     | 8.6  | 5.3 | 1.6 | 3.5 | 8.2 | 5.7 | 1.5 | 5.0 | 4.1 | 3.8 | 6.6 | 6.5  | 8.7  | 9.8  | 8.3  | 3.7 | 4.5 | 1.0 | 2.3 | 1.3 | Archaeoglobales    |
| 27  | <i>Archaeoglobus fulgidus</i>        | 48     | 8.9  | 4.9 | 1.8 | 3.2 | 6.9 | 5.8 | 1.5 | 5.5 | 4.2 | 3.6 | 7.2 | 7.8  | 8.6  | 9.5  | 7.2  | 3.9 | 4.6 | 1.0 | 2.6 | 1.2 | Archaeoglobales    |
| 23  | <i>Ferroglobus placidus</i>          | 45     | 9.5  | 4.7 | 1.5 | 3.4 | 8.4 | 5.3 | 1.5 | 5.5 | 4.0 | 3.8 | 6.7 | 7.1  | 8.6  | 9.5  | 7.7  | 3.7 | 4.8 | 1.0 | 2.2 | 1.1 | Archaeoglobales    |
| 37  | <i>Palaeococcus ferrophilus</i>      | 55     | 8.9  | 4.6 | 1.7 | 3.2 | 6.3 | 6.2 | 1.7 | 5.1 | 4.6 | 3.8 | 7.9 | 7.5  | 8.5  | 10.5 | 6.6  | 4.3 | 4.3 | 1.2 | 2.5 | 0.5 | Thermococcales     |
| 13  | <i>Pyrococcus furiosus</i>           | 40     | 8.9  | 4.4 | 1.8 | 3.5 | 8.1 | 5.3 | 1.5 | 4.9 | 4.4 | 4.0 | 7.1 | 6.6  | 7.9  | 10.1 | 8.7  | 4.3 | 4.4 | 1.2 | 2.3 | 0.6 | Thermococcales     |
| 17  | <i>Pyrococcus horikoshii</i>         | 41     | 8.7  | 4.4 | 1.7 | 3.5 | 8.0 | 5.6 | 1.5 | 5.2 | 4.3 | 3.9 | 7.1 | 6.4  | 7.7  | 10.2 | 8.8  | 4.3 | 4.4 | 1.2 | 2.4 | 0.6 | Thermococcales     |
| 24  | <i>Pyrococcus abyssi</i>             | 45     | 8.8  | 4.6 | 1.7 | 3.3 | 7.8 | 5.7 | 1.5 | 5.0 | 4.2 | 3.8 | 7.3 | 6.7  | 8.1  | 10.2 | 8.5  | 4.2 | 4.4 | 1.2 | 2.4 | 0.6 | Thermococcales     |
| 32  | <i>Thermococcus onnurineus</i>       | 51     | 8.6  | 4.7 | 1.8 | 3.2 | 6.8 | 5.7 | 1.6 | 4.8 | 4.7 | 3.9 | 7.6 | 7.6  | 8.1  | 10.4 | 7.6  | 4.3 | 4.4 | 1.2 | 2.5 | 0.6 | Thermococcales     |
| 33  | <i>Thermococcus kodakaraensis</i>    | 52     | 8.8  | 4.7 | 1.8 | 3.2 | 6.9 | 5.8 | 1.6 | 5.0 | 4.6 | 3.8 | 7.6 | 7.4  | 8.3  | 10.5 | 7.0  | 4.4 | 4.3 | 1.3 | 2.3 | 0.5 | Thermococcales     |
| 12  | <i>Ferroplasma acidarmanus Fer1</i>  | 38     | 6.2  | 5.4 | 1.9 | 6.0 | 7.4 | 3.9 | 1.6 | 7.3 | 5.1 | 4.9 | 7.0 | 6.0  | 6.1  | 8.6  | 10.0 | 3.5 | 4.7 | 0.7 | 3.1 | 0.6 | Thermoplasmatales  |
| 9   | <i>Picrophilus torridus</i>          | 36     | 5.7  | 5.9 | 1.5 | 6.6 | 6.9 | 4.4 | 1.5 | 7.4 | 4.4 | 5.4 | 6.5 | 5.6  | 5.7  | 8.6  | 11.1 | 3.5 | 4.9 | 0.7 | 3.1 | 0.6 | Thermoplasmatales  |
| 14  | <i>Thermoplasma volcanium</i>        | 40     | 6.4  | 5.5 | 2.1 | 4.7 | 6.9 | 4.7 | 1.5 | 7.5 | 4.8 | 4.7 | 7.0 | 6.4  | 7.1  | 8.7  | 9.2  | 3.8 | 4.7 | 0.8 | 2.8 | 0.6 | Thermoplasmatales  |
| 26  | <i>Thermoplasma acidophilum</i>      | 46     | 6.0  | 5.8 | 2.2 | 4.3 | 5.7 | 5.5 | 1.6 | 7.5 | 4.8 | 4.6 | 7.3 | 7.0  | 7.2  | 8.4  | 9.0  | 3.9 | 4.7 | 0.9 | 3.2 | 0.6 | Thermoplasmatales  |
| 52  | <i>Salinibacter ruber</i>            | 66     | 7.0  | 7.0 | 3.5 | 2.5 | 2.1 | 7.7 | 2.2 | 5.8 | 6.2 | 2.6 | 8.4 | 10.7 | 7.9  | 9.7  | 3.7  | 5.7 | 3.4 | 1.3 | 1.9 | 0.7 | Sphingobacteriales |
| 10  | <i>Halothermothrix orenii</i>        | 38     | 7.5  | 5.5 | 2.7 | 5.2 | 7.9 | 4.7 | 1.6 | 5.4 | 4.8 | 3.9 | 7.4 | 5.8  | 7.2  | 9.9  | 8.8  | 3.7 | 4.1 | 0.9 | 2.3 | 0.7 | Halanaerobiales    |
| 53  | <i>Halorhodospira halophila</i>      | 67     | 7.5  | 6.1 | 3.9 | 2.0 | 1.8 | 8.7 | 2.4 | 4.5 | 4.8 | 2.4 | 8.9 | 12.0 | 7.5  | 10.7 | 4.1  | 5.4 | 3.1 | 1.4 | 2.0 | 0.9 | Chromatiales       |
| 47  | <i>Chromohalobacter salexigens</i>   | 64     | 6.2  | 6.1 | 3.7 | 2.4 | 2.5 | 7.5 | 2.6 | 5.4 | 5.2 | 2.4 | 8.1 | 11.5 | 7.2  | 11.3 | 4.6  | 4.9 | 3.4 | 1.5 | 2.5 | 1.0 | Oceanospirillales  |

**Supplementary Table S7.** Environmental sampling and habitat characteristics of database matches to Nanohaloarchaea 16S rRNA gene sequences.

| Clone group | Location                                    | Site characteristics                                        | Sample processing                                 | PCR primers           | Reference                        |
|-------------|---------------------------------------------|-------------------------------------------------------------|---------------------------------------------------|-----------------------|----------------------------------|
| LT          | Lake Tyrrell, Australia                     | Thalassohaline, neutral pH, 29% salinity, crystallizer pond | 0.1 $\mu\text{m}$ (0.8 $\mu\text{m}$ pre-filter)  | Arc21F<br>Arc529R     | This study                       |
| CV          | Chula Vista San Diego, USA                  | Thalassohaline, neutral pH, 27% salinity, crystallizer pond | 0.1 $\mu\text{m}$ (0.8 $\mu\text{m}$ pre-filter)  | Arc21F<br>LT_1215R    | This study                       |
| Cry/Baj/LDS | Australia                                   | Neutral pH, 34% salinity                                    | Direct Centrifugation                             | ArcF1<br>Arc1492R     | (Oh <i>et al.</i> , 2010)        |
| MSP         | Magadi Salt Pond, Kenya, East Africa        | Soda lake, pH 12, crystallizer pond                         | 0.22 $\mu\text{m}$ (0.8 $\mu\text{m}$ pre-filter) | Arc27Fa<br>Arc1492R   | (Grant <i>et al.</i> , 1999)     |
| SFH1E041    | Tunisia                                     | Neutral pH, Solar saltern                                   | Direct Centrifugation                             | Arc21F<br>Univ1390R   | (Baati <i>et al.</i> , 2008)     |
| ARDARCSS13  | Sidi Ameur Salt Lake, Algerian Sahara       | Salt Lake soil                                              | ND                                                | ND                    | EU869371.1 (Unpublished)         |
| Sua-GRP6    | Makgadikgadi salt pans, Botswana            | Alkaline evaporator pond                                    | Centrifugation                                    | Arc751F<br>UA1406R    | (Gareeb and Setani, 2009)        |
| 9cA6        | Rio Mesquite, Cuatro Cienegas Basin, Mexico | Neutral pH Shallow pond                                     | Direct to 0.45 $\mu\text{m}$ filter               | Univ515F<br>Univ1492R | (Escalante <i>et al.</i> , 2008) |
| EN          | Lake Erliannor, China                       | pH 8, >30% salinity                                         | Direct to 0.45 $\mu\text{m}$ filter               | Arc27Fa<br>Arc1492R   | (Pagaling <i>et al.</i> , 2009)  |
| SH          | Lake Shangmata, China                       | pH 8.5, >30% salinity                                       | Direct to 0.45 $\mu\text{m}$ filter               | Arc27Fa<br>Arc1492R   | (Pagaling <i>et al.</i> , 2009)  |
| XH          | Unknown lake, Inner Mongolia China          | pH 8.5, >30% salinity                                       | Direct to 0.45 $\mu\text{m}$ filter               | Arc27Fa<br>Arc1492R   | (Pagaling <i>et al.</i> , 2009)  |
| XA          | Unknown pool, Inner Mongolia China          | pH 9.5, 19% salinity                                        | Direct to 0.45 $\mu\text{m}$ filter               | Arc27Fa<br>Arc1492R   | (Pagaling <i>et al.</i> , 2009)  |
| AGA         | Salar Guayatayoc, Argentina                 | pH neutral                                                  | Direct to 0.45 $\mu\text{m}$ filter               | Arc27Fa<br>Arc1492R   | (Pagaling <i>et al.</i> , 2009)  |

**Supplementary Table S8.** NCBI accession numbers and 16S rRNA gene coordinates of taxa used in the construction of phylogenetic trees shown in Figure 3 and Supplementary Figure S2A.

| Genome                                                   | NCBI accession number | DNA strand | Coordinates      |
|----------------------------------------------------------|-----------------------|------------|------------------|
| <i>Archaeoglobus fulgidus</i> DSM 4304                   | NC_000917.1           | (-) strand | 1790478-1788987  |
| <i>Archaeoglobus profundus</i> Av18, DSM 5631            | NC_000917.1           | (-) strand | 1051439-1049930  |
| Candidatus <i>Methanoregula boonei</i> 6A8               | NC_009712.1           | (-) strand | 2251978-2250513  |
| Candidatus <i>Methanosphaerula palustris</i> E1-9c       | NC_011832.1           | (+) strand | 754054-755515    |
| <i>Ferroplasma acidarmanus</i> Fer1, unfinished sequence | gbAABC05000010.1      | (+) strand | 30596-32036      |
| <i>Haloarcula marismortui</i> ATCC 43049 chromosome I    | AY596297.1            | (+) strand | 2632355-2633826  |
| <i>Halobacterium salinarum</i> R1                        | NC_010364.1           | (+) strand | 1863623-1865094  |
| <i>Halogeometricum borinquense</i> PR3, DSM 11551        | ABTX01000001.1        | (+) strand | 1509934-1511411  |
| <i>Halomicrobium mukohataei</i> arg-2, DSM 12286         | NC_013202.1           | (-) strand | 1954831-1956302  |
| <i>Haloquadratum walsbyi</i> DSM 16790                   | NC_008212.1           | (+) strand | 67537-69008      |
| <i>Halorhabdus utahensis</i> AX-2, DSM 12940             | NC_013158.1           | (+) strand | 1665958 -1667429 |
| <i>Halorubrum lacusprofundi</i> ATCC 49239 chromosome 2  | NC_012028.1           | (+) strand | 161307-162776    |
| <i>Haloterrigena turkmenica</i> VKM, DSM 5511            | NC_013743.1           | (+) strand | 513463-514937    |
| <i>Methanobacterium thermoautotrophicum</i> str. Delta H | NC_000916.1           | (+) strand | 1602210-1603688  |
| <i>Methanobrevibacter smithii</i> ATCC 35061             | NC_009515.1           | (-) strand | 334957-333483    |
| <i>Methanocaldococcus jannaschii</i> DSM 2661            | NC_000909.1           | (-) strand | 159459-157985    |
| <i>Methanococcoides burtonii</i> DSM 6242                | NC_007955.1           | (-) strand | 1023598-1022125  |
| <i>Methanococcus aeolicus</i> Nankai-3                   | NC_009635.1           | (-) strand | 1196101-1194635  |
| <i>Methanococcus maripaludis</i> C5                      | NC_009135.1           | (+) strand | 1594066-1595530  |
| <i>Methanococcus vannieli</i> SB                         | NC_009634.1           | (+) strand | 155 -1619        |
| <i>Methanococcus voltae</i> A3, unfinished sequence      | NC_014222.1           | (+) strand | 1536115-1534651  |
| <i>Methanocorpusculum labreanum</i> Z                    | NC_008942.1           | (+) strand | 403632-405096    |
| <i>Methanoculleus marisnigri</i> JR1                     | NC_009051.1           | (-) strand | 1824115-1822651  |
| <i>Methanohalophilus mahii</i> DSM 05219                 | NC_014002.1           | (+) strand | 561038-562512    |
| <i>Methanoplanus petrolearius</i> SEBR 4847, DSM 11571   | NC_014507.1           | (+) strand | 740158 -741625   |
| <i>Methanopyrus kandleri</i> AV19                        | NC_003551.1           | (-) strand | 518289-516896    |
| <i>Methanosaeta thermophila</i> PT                       | NC_008553.1           | (+) strand | 845527-846999    |
| <i>Methanosalsum zhilinae</i> WeN5, DSM 4017             | FJ224366.1            | (+) strand | Direct sequence  |
| <i>Methanosarcina acetivorans</i> str. C2A               | NC_003552.1           | (+) strand | 1073041-1074470  |
| <i>Methanosarcina barkeri</i> str. fusaro chromosome I   | NC_007355             | (-) strand | 4677310-4678787  |
| <i>Methanosarcina mazei</i> strain Goel                  | refNC_003901.1        | (-) strand | 236779-235306    |
| <i>Methanosphaera stadtmanae</i> DSM 3091                | NC_007681.1           | (+) strand | 408655-410144    |
| <i>Methanospirillum hungatei</i> JF-1                    | NC_007796.1           | (+) strand | 39814-41279      |
| <i>Methanothermus fervidus</i> DSM 2088                  | NC_014658.1           | (-) strand | 28362-26991      |
| <i>Natrialba magadii</i> ATCC 43099, unfinished sequence | NC_013922.1           | (+) strand | 26876-28343      |
| <i>Natronomonas pharaonis</i> DSM 2160                   | NC_007426.1           | (-) strand | 215928-214463    |
| <i>Palaeococcus ferrophilus</i> DMJ, DSM 13482           | NR_028149.1           | (+) strand | Direct sequence  |
| <i>Picrophilus torridus</i> DSM 9790                     | NC_005877.1           | (-) strand | 472195-470727    |

| <b>Genome</b>                                    | <b>NCBI accession number</b> | <b>DNA strand</b> | <b>Coordinates</b> |
|--------------------------------------------------|------------------------------|-------------------|--------------------|
| <i>Pyrococcus abyssi</i> GE5                     | NC_000868.1                  | (+) strand        | 205128-206630      |
| <i>Pyrococcus furiosus</i> DSM 3638              | NC_003413.1                  | (+) strand        | 136930-138426      |
| <i>Pyrococcus horikoshii</i> OT3 DNA             | NC_000961.1                  | (+) strand        | 190975-192469      |
| <i>Thermococcus onnurineus</i> NAI               | NC_011529.1                  | (+) strand        | 1279595-1278100    |
| <i>Thermoplasma volcanium</i> GSS1 DNA           | NC_002689.2                  | (-) strand        | 1520246-1518773    |
| uncultured halophilic archaeon J0756AB           | This study                   | (+) strand        | This study         |
| uncultured halophilic archaeon J07AB43           | This Study                   | (-) strand        | This Study         |
| Uncultured methanogenic archaeon RC-I            | AM114193.2                   | (+) strand        | 2083318-2084792    |
| <i>Ferroplasma placidus</i> AEDIII2DO, DSM 10642 | AF220166.1                   | (+) strand        | 1404007-1405474    |
| <i>Thermococcus kodakarensis</i> KOD1            | NC_006624.1                  | (+) strand        | 2022864-2024361    |
| <i>Thermoplasma acidophilum</i> 122-1B2          | NC_002578.1                  | (-) strand        | 1475770-1474300    |

## Supplementary Figure Legends

*Supplementary Figure S1.* Location of sampling sites and sample characteristics.

*Supplementary Figure S2.* Unrooted maximum-likelihood phylogenetic trees for the Euryarchaeota. Trees are based on (A) 16S rRNA sequences (48 sequences, 1275 positions; NCBI accession numbers and coordinates provided in Supplementary Table S9) and (B) concatenation of 57 ribosomal proteins (43 sequences, 5858 positions). Names of euryarchaeal sub-lineages are shown in the box. Numbers at nodes represent bootstrap values (A) inferred by TreeFinder/PhyML; (B) inferred by TreeFinder based on amino acid alignments and the 4 state recoded amino acid alignments, shown in parentheses. Bootstrap values of less than 50% are indicated by "-" sign. Scale bar represents an average of 0.1 substitutions per site.



## Supplementary Figure S1

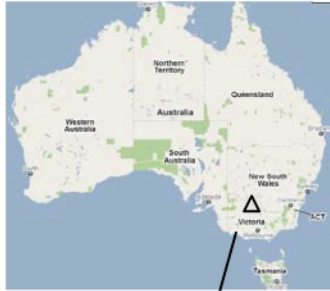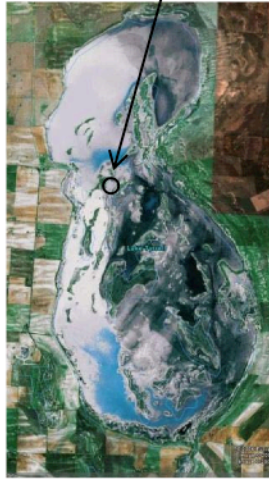

Lake Tyrrell (LT), Victoria, Australia

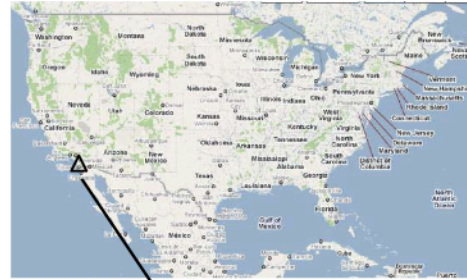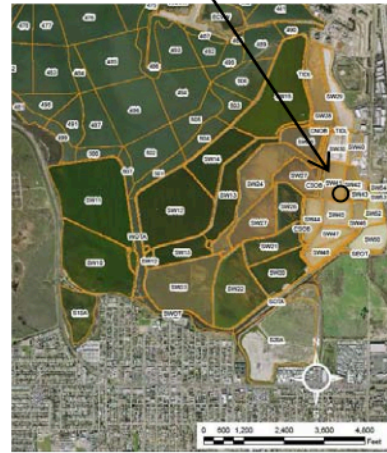

South Bay Salt Works, Chula Vista (CV), California USA

Images:

©2010 Google - Imagery ©2010 TerraMetrics,  
Map data ©2010 Google, Whereis(R), Sensis Pty Ltd  
©California Department of Fish and Game

| Site | Sampling Date | Temp (°C) | pH   | Total Dissolved Solids - Salinity (%) |
|------|---------------|-----------|------|---------------------------------------|
| LT   | 1/23/2007     | 21.6      | 7.30 | 29                                    |
| LT   | 1/25/2007     | 27.9      | 7.09 | 29                                    |
| CV   | 10/27/2009    | 22.0      | 7.40 | 27                                    |
| CV   | 06/22/2009    | 28.0      | 7.50 | 27                                    |

# Supplementary Figure S2

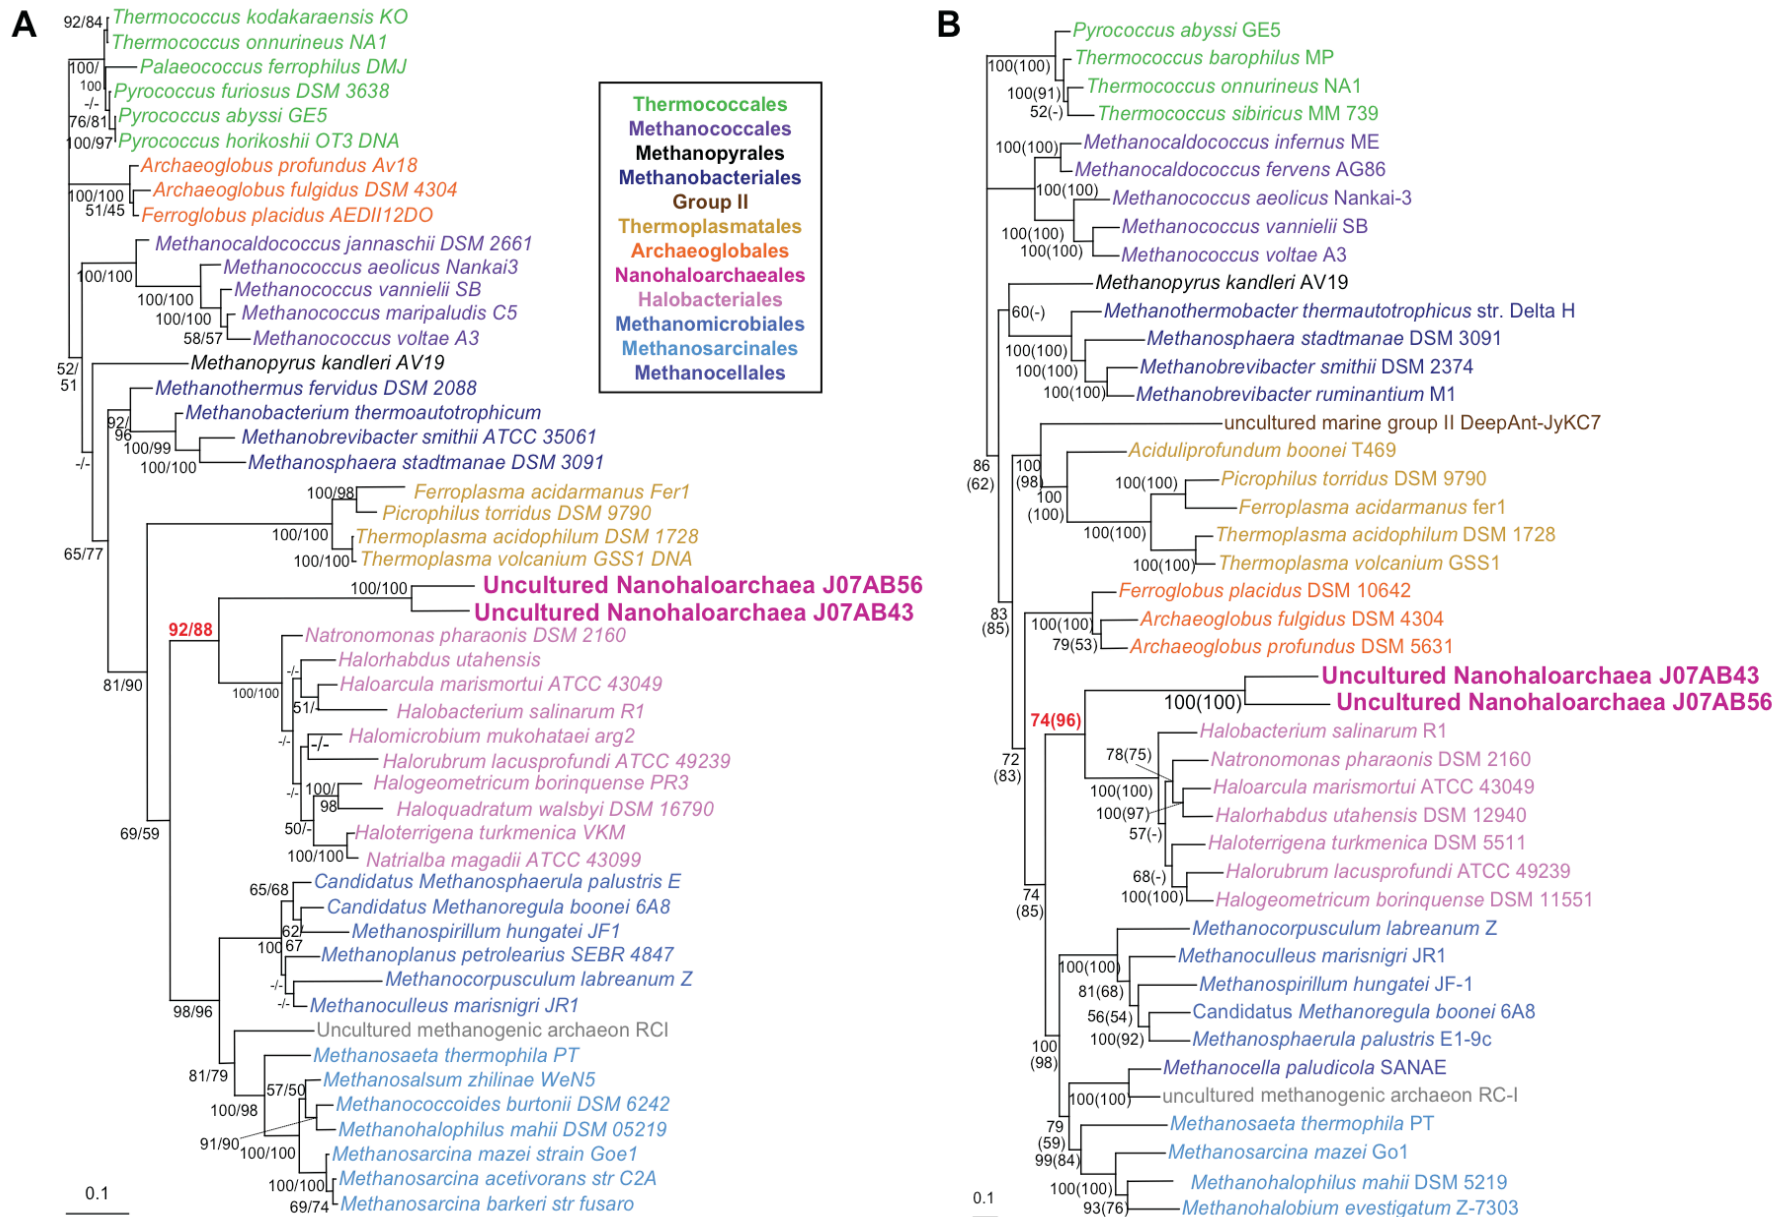

## References

- Baati H, Guerhazi S, Amdouni R, Gharsallah N, Sghir A, Ammar E (2008). Prokaryotic diversity of a Tunisian multipond solar saltern. *Extremophiles* **12**: 505-18.
- DeSantis TZ, Hugenholtz P, Larsen N, Rojas M, Brodie EL, Keller K *et al* (2006). Greengenes, a chimera-checked 16S rRNA gene database and workbench compatible with ARB. *Appl Environ Microbiol* **72**: 5069-72.
- Escalante AE, Eguiarte LE, Espinosa-Asuar L, Forney LJ, Noguez AM, Souza Saldivar V (2008). Diversity of aquatic prokaryotic communities in the Cuatro Ciénegas basin. *FEMS Microbiol Ecol* **65**: 50-60.
- Gareeb A, Setani M (2009). Assessment of alkaliphilic haloarchaeal diversity in Sua pan evaporator ponds in Botswana. *Afr. J. Biotechnol.* **8**: 259-267.
- Grant S, Grant WD, Jones BE, Kato C, Li L (1999). Novel archaeal phylotypes from an East African alkaline saltern. *Extremophiles* **3**: 139-45.
- Guindon S, Gascuel O (2003). A simple, fast, and accurate algorithm to estimate large phylogenies by maximum likelihood. *Syst Biol* **52**: 696-704.
- Hrdy I, Hirt RP, Dolezal P, Bardonova L, Foster PG, Tachezy J *et al* (2004). Trichomonas hydrogenosomes contain the NADH dehydrogenase module of mitochondrial complex I. *Nature* **432**: 618-22.
- Jobb G, von Haeseler A, Strimmer K (2004). TREEFINDER: a powerful graphical analysis environment for molecular phylogenetics. *BMC Evol Biol* **4**: 18.
- Oh D, Porter K, Russ B, Burns D, Dyal-Smith M (2010). Diversity of Haloquadratum and other haloarchaea in three, geographically distant, Australian saltern crystallizer ponds. *Extremophiles* **14**: 161-9.
- Pagaling E, Wang H, Venables M, Wallace A, Grant WD, Cowan DA *et al* (2009). Microbial biogeography of six salt lakes in Inner Mongolia, China, and a salt lake in Argentina. *Appl Environ Microbiol* **75**: 5750-60.

Philippe H (1993). MUST, a computer package of Management Utilities for Sequences and Trees. *Nucleic Acids Res* **21**: 5264-72.

Susko E, Roger AJ (2007). On reduced amino acid alphabets for phylogenetic inference. *Mol Biol Evol* **24**: 2139-50.
